# Supplementary material for: Long-term glycemic variability and the risk of heart failure: a meta-analysis
Source: PeerJ. 2025 Nov 27;13:e20401. doi: 10.7717/peerj.20401 (PMC12665266; doi:10.7717/peerj.20401)
Supplement: Supplemental Information 2 [file peerj-13-20401-s002.xlsx]

## Sheet: Sheet1
Study	Country	Design	Particpant characteristics	Sample size	Mean age (years)	Men (%)	DM (%)	Parameters for GV	Cutoffs of GV parameters	Times of glycemic parameters used for GV calculation	Mean follow-up duration (years)	Definition of HF outcome	No. of paitients with HF	Variables adjusted or matched
Gu 2018	China	RC	T2DM and HTN without clinical signs or symptoms of HF	201	65.3	60.2	100	HbA1c-SD and HbA1c-CV	Median	HbA1c measure times: 11.8 (mean)	7.3	Symptomatic HFpEF as clinically diagnosed according to the 2013ACCF/AHA guideline of HF	18	Age, sex, SBP, DBP, HbA1c-mean, eGFR, BMI, duration of T2DM and hypertension, AF, medical treatment, LAD, LVMI, E/E0, and LVEF
Kwon 2019	Korea	RC	General population aged ≥40 years who had undergone ≥3 health check-ups	3820191	51.6	52.9	0	FPG-VIM, FPG-SD, and FPG-CV	Q4:Q1	FPG measure times: at least 3	5.3	ICD codes evidenced HF diangosed in outpatient clinic or hospitalization	17253	Age, sex, smoking status, alcohol consumption, exercise, and income, baseline BP, BMI, FBG, TC, histories of IHD, CKD, and COPD
Kaze 2020	USA	Post-hoc analysis	Overweight or obese adults with T2DM aged 45 to 76 years	3560	58.4	37.9	100	HbA1c-SD, HbA1c-CV, HbA1c-ASV, HbA1c-VIM, FPG-SD, FPG-CV, FPG-ASV, and FPG-VIM	Q4:Q1	HbA1C and FPG measure times: 4	6.8	First HF hospitalization or HF-related death	91	Age, sex, race/ethnicity, randomization arm, BMI, current smoking, alcohol drinking, use of BP-lowering medication, average total-to-HDL cholesterol ratio, eGFR, duration of diabetes, average SBP, and average HbA1c
Segar 2020	USA	Post-hoc analysis	T2DM patients	8576	62.4	61.6	100	HbA1c-ASV	Q5:Q1	HbA1c measure times: 8 (median); FPG measure times: 4 (median)	6.4	First HF hospitalization or HF-related death	388	Age, sex, race, level of education, randomization arm, history of CVD, conventional CV risk factors, CV medications, and baseline HbA1c
Li 2020	UK	RC	T2DM patients aged ≥40 years	19059	63.3	54.6	100	HbA1c variability score (HSV)	>80 versus <20	HbA1c measure times: 12 (median)	6.8	First HF hospitalization or HF-related death	853	Age, sex, smoking, hypertension, BMI, HDL cholesterol, eGFR, antiplatelet therapy, and CCI
Wan 2020	Hongkong (China)	PC	T2DM patients aged 45 to 84 years	147811	64.2	46	100	HbA1c-SD	≥ 3.0 versus < 0.24	HbA1c measure times: 3.2 (median)	7.4	ICD codes evidenced HF	7908	Age, sex, smoking, duration of diabetes, BMI, SBP, DBP, LDL cholesterol, eGFR, antidiabetics, lipidlowering agents, CCI, and usual HbA1c
Lin 2021	Taiwan (China)	RC	T2DM patients	3824	57.8	50.2	100	HbA1c-SD	T3:T1	HbA1c measure times: at least 3	11.7	ICD codes evidenced HF	315	Age, sex, diabetes duration,BMI, SBP, TC,TG, HDL-C, LDL-C, eGFR, CAD, HTN, stroke, antidiabetics, and CV medications
Ceriello 2022	Sweden	RC	T2DM patients	101533	64.3	55.6	100	HbA1c-SD	Q4:Q1	HbA1c measure times: at least 5	4.4	ICD codes evidenced HF hospitalization	NR	Age,sex, duration of diabetes, body weight, smoking, HbA1c, SBP, DBP, TC, HDL, LDL, triglycerides, albuminuria, eGFR, retinopathy, and concurrent medications
Wang 2023 C1	China	PC	Community population	98554	53.6	78.8	4.5	FPG-VIM, FPG-SD, and FPG-CV	Q4:Q1	FPG measure times: at least 3	6.3	Clinically diagnosed HF according to the ESF HF guideline	1218	Age, sex, DM, hypertension, baseline FPG, resting HR, LDL-C and HDL-C, SBP, DBP, BMI, hs-CRP, smoking, alcohol abuse, hysical activity, and concurrent medications
Wang 2023 C2	Hongkong (China)	RC	General adult population	22217	64.9	42.7	0.2	FPG-VIM, FPG-SD, and FPG-CV	Q4:Q1	FPG measure times: at least 3	16.2	ICD codes evidenced HF diangosed in outpatient clinic or hospitalization	4041	Age, sex, HbA1c, LDL-C, HDL-C, history of hypertension, DM, SBP, DBP, and concurrent medications
Manosroi 2023	Thailand	PC	Prediabetes and T2DM patients	3811	64.7	46.6	NR	HbA1c-SD	Q4:Q1	HbA1c measure times: at least 3	4.5	HF hospitalization evidenced by medical records	110	Age, sex, educational level, BMI, established ASCVD status, SBP, smoking status, mean HbA1c during follow-up, lipid profiles, SCr, number of HbA1c measurements, and concurrent medications

## Sheet: Sheet2
Study	Representativeness of the exposed cohort	Selection of the non exposed cohort	Ascertainment of exposure	Outcome not present at baseline	Control for age and sex	Control for other confounding factors	Assessment of outcome	Enough long follow-up duration	Adequacy of follow-up of cohorts	Total	5 years
Gu 2018	0	1	1	1	1	1	1	1	1	8
Kwon 2019	0	1	1	1	1	1	0	1	1	7
Kaze 2020	0	1	1	1	1	1	0	1	1	7
Segar 2020	0	1	1	1	1	1	0	1	1	7
Li 2020	0	1	1	1	1	1	0	1	1	7
Wan 2020	1	1	1	1	1	1	0	1	1	8
Lin 2021	0	1	1	1	1	1	0	1	1	7
Ceriello 2022	0	1	1	1	1	1	0	0	1	6
Wang 2023 C1	1	1	1	1	1	1	1	1	1	9
Wang 2023 C2	0	1	1	1	1	1	0	1	1	7
Manosroi 2023	1	1	1	1	1	1	0	0	1	7

## Sheet: Sheet3
	HR	LL	UL	LnHR	SE	Parameters
Gu 2018	1.754	1.003	3.104	0.561899	0.288188	HbA1c-SD
Gu 2018	1.604	1.064	2.419	0.472501	0.20952	HbA1c-CV
Kwon 2019	1.15	1.102	1.2	0.139762	0.0217334	FPG-VIM
Kwon 2019	1.127	1.08	1.175	0.119559	0.0215069	FPG-SD
Kwon 2019	1.136	1.088	1.186	0.127513	0.0220013	FPG-CV
Kaze 2020	1.71	0.69	4.24	0.536493	0.46317	HbA1c-SD
Kaze 2020	1.25	0.55	2.83	0.223144	0.417886	HbA1c-CV
Kaze 2020	0.93	0.48	1.81	-0.0725707	0.338596	HbA1c-ASM
Kaze 2020	1.3	0.61	2.75	0.262364	0.384157	HbA1c-VIM
Kaze 2020	2.05	0.8	5.31	0.71784	0.482841	FPG-SD
Kaze 2020	1.41	0.68	2.9	0.34359	0.369993	FPG-CV
Kaze 2020	1.06	0.57	1.95	0.0582689	0.313762	FPG-ASM
Kaze 2020	1.61	0.81	3.23	0.476234	0.352858	FPG-VIM
Segar 2020	2.93	1.88	4.55	1.075	0.225473	HbA1c-ASM
Li 2020	3.23	1.76	5.93	1.17248	0.309875	HSV
Wan 2020	2.49	2.13	2.91	0.912283	0.0795998	HbA1c-SD
Lin 2021	1.17	0.84	1.64	0.157004	0.170676	HbA1c-SD
Ceriello 2022	1.39	1.27	1.53	0.329304	0.047513	HbA1c-SD
Wang 2023 C1	1.315	1.112	1.555	0.273837	0.0855396	FPG-SD
Wang 2023 C1	1.245	1.055	1.47	0.219136	0.0846229	FPG-CV
Wang 2023 C1	1.285	1.081	1.526	0.250759	0.0879498	FPG-VIM
Wang 2023 C2	1.435	1.183	1.741	0.361165	0.098573	FPG-SD
Wang 2023 C2	1.362	1.145	1.62	0.308954	0.0885259	FPG-CV
Wang 2023 C2	1.338	1.12	1.598	0.291176	0.0906694	FPG-VIM
Manosroi 2023	3.34	1.2	9.26	1.20597	0.521271	HbA1c-SD
